# Supplementary material for: Heterogeneous expression of the SARS-Coronavirus-2 receptor ACE2 in the human respiratory tract
Source: PubMed Central journal article supplement (PMC7302220; doi:10.1101/2020.04.22.056127), 2020-08-13
Supplement: NIHPP2020.04.22.056127-supplement-1.pdf [file NIHPP2020.04.22.056127-supplement-1.pdf]

559 **Supplemental information:**

**Supplemental Figure 1**

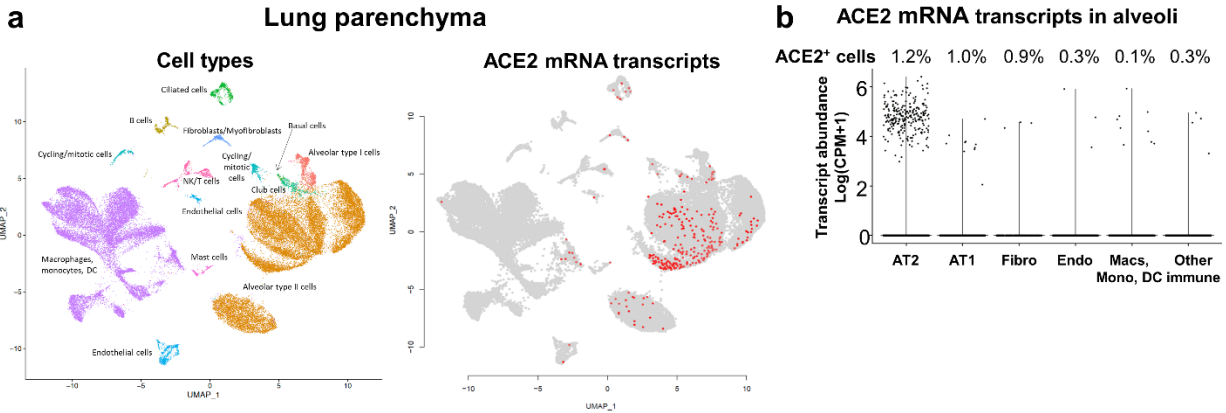

560

561 **Supplemental Figure 1.** Single-cell RNA sequencing reanalyses of ACE2 transcript abundance

562 in lung parenchyma (23). Summative observations from all donors. **a)** Uniform manifold

563 approximation and projection (UMAP) visualizations. Cells were clustered using a shared

564 nearest neighbor (SNN) approach. Cell types associated with each cluster were identified by

565 determining marker genes for each cluster. Each data point denotes a cell. On the right panel,

566 cells with ACE2 transcripts are shown in red. **b)** Violin plots representing ACE2 expression in

567 the alveoli. Airway cells (basal, mitotic, ciliated, club) are not shown. Percentage of ACE2<sup>+</sup> cells

568 within each cell type shows ACE2 transcripts in 1.2% of alveolar type II cells and in 0.1% of

569 macrophages, monocytes, or dendritic cells. Each data point denotes a cell, most cells have no

570 expression (0). AT2: alveolar type II. AT1: alveolar type I. Macs: Macrophages. Mono:

571 Monocytes. DC: dendritic cells. Other immune cells: B cells, mast cells, natural killer/T cells.

572 Endo: Endothelial. Fibro: Fibroblasts/myofibroblasts. NK: Natural killer. CPM: Counts per

573 million.

574

## Supplemental Figure 2

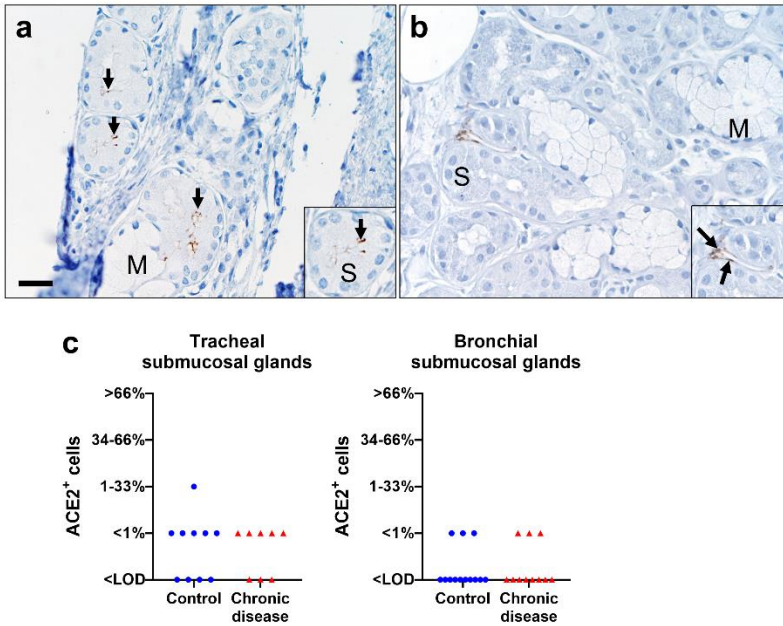

575

576 **Supplemental Figure 2.** Representative tissue section from submucosa of large airways

577 (trachea/bronchi) showing ACE2 protein localization (brown color, black arrows) (**a, b**) and

578 scores (**c**). **a**) Submucosal glands had uncommon to localized apical ACE2 protein (arrows) in

579 serous (S) cells, but not mucous (M) cells. **b**) Submucosal glands also had absent to uncommon

580 ACE2 protein (arrows) in the interstitium that centered on vascular walls and endothelium. This

581 vascular staining was uncommonly seen in lung too and corresponded to the low levels seen in

582 transcripts for these endothelial cells ([Supplemental Figure 1a-b](#)). Note the absence of ACE2

583 staining in serous (S) or mucous (M) cells of the gland (**b**). **c**) ACE2 protein scores for each

584 subject for serous cells in submucosal glands from trachea and bronchi, in control versus chronic

585 disease groups ( $P > 0.9999$ ,  $0.9999$ , respectively, Mann-Whitney U test). Bar = 25  $\mu$ m. LOD:

586 Limit of detection.

587

### Supplemental Figure 3

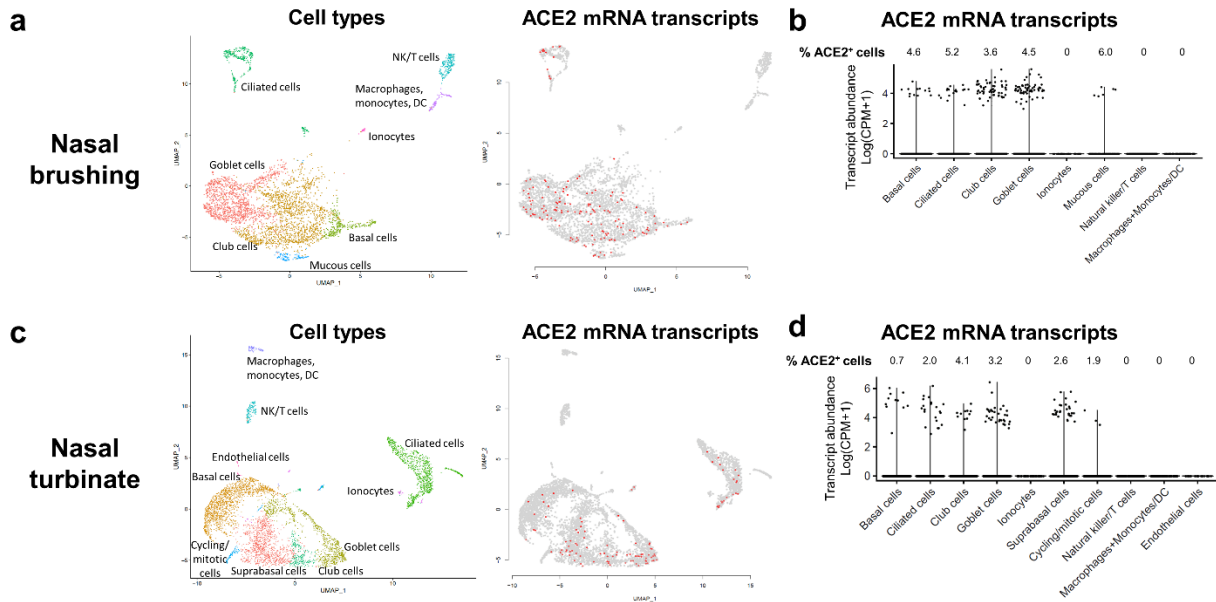

588

589 **Supplemental Figure 3.** Single-cell RNA sequencing reanalyses of ACE2 transcript abundance

590 in nasal brushing (**a, b**) and nasal turbinate (**c, d**) (24). **a, c**) Uniform manifold approximation

591 and projection (UMAP) visualizations. Cells were clustered using a shared nearest neighbor

592 (SNN) approach. Cell types associated with each cluster were identified by determining marker

593 genes for each cluster. Each data point denotes a cell. On the right panels, cells with ACE2

594 transcripts are shown in red. **b, d**) Violin plots representing ACE2 expression. In nasal turbinate

595 and nasal brushing, percentage of ACE2<sup>+</sup> cells within each cell type shows ACE2 expression on

596 epithelial cells. Each data point denotes a cell, most cells have no expression (0). DC: dendritic

597 cells. NK: Natural killer. CPM: Counts per million.

598

## Supplemental Figure 4

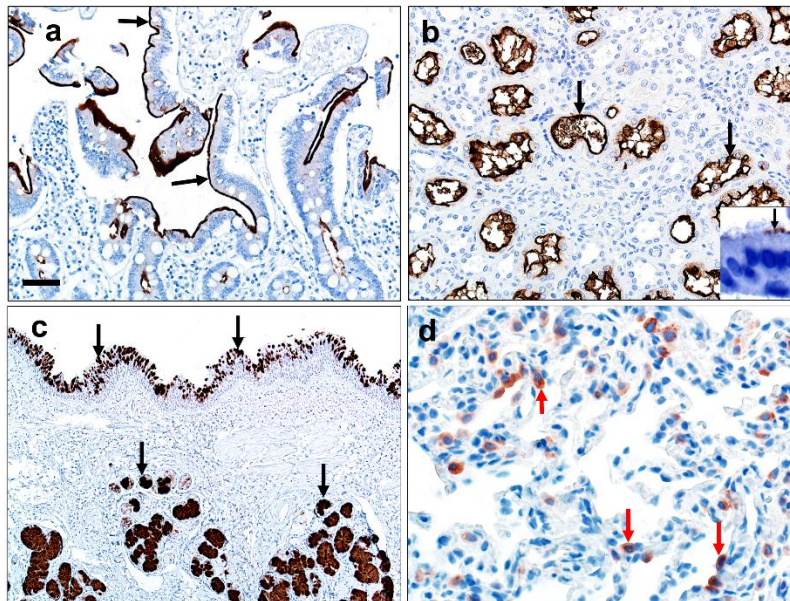

599

600 **Supplemental Figure 4.** Quality controls for ACE2 immunohistochemistry technique (**a, b**) and  
601 tissue quality (**c, d**). **a, b**) ACE2 protein (brown color, black arrows) was detected along the  
602 apical surface of small intestine enterocytes (**a**), renal tubule epithelium (**b**), and ciliated cells (**b**,  
603 **inset**) of primary airway cell cultures. These findings demonstrate specific detection of ACE2  
604 protein in cells/tissues consistent with known ACE2 expression. **c**) Representative  
605 immunostaining of bronchus detected abundant MUC5B protein (brown color, black arrows) in  
606 mucous cells of surface epithelium (top) and submucosal glands (bottom). **d**) Representative  
607 sections of alveoli had SP-C<sup>+</sup> alveolar type II cells (red color, red arrows). These results (**c, d**)  
608 demonstrate the tissues were intact and that immunostaining can be used to detect native airway  
609 (**c**) and lung (**d**) proteins. Bar = 40 (a, b), 80 (c), and 20  $\mu$ m (d).

610



615 **Supplemental Table 1. ACE2 protein reported in surface epithelium (SE) of human**  
 616 **respiratory tract surface epithelium.**

| Reported Cases [n]                                                 | Primary Ab | SN                                           | T           | B               | Br   | Al                         | Summary comments                                                                       |
|--------------------------------------------------------------------|------------|----------------------------------------------|-------------|-----------------|------|----------------------------|----------------------------------------------------------------------------------------|
| Non-diseased lungs / nasal [5 each]; diseased lungs [5] (17)       | Polyclonal | SE (C++, basal cells in squamous epithelium) | n.d.        | SE (C+)         | n.d. | AT1 (C++); AT2 (C++)       | Abundant ACE2 protein in lung epithelia                                                |
| Non-diseased lungs [5] (18)                                        | Undefined  | n.d.                                         | SE (C+, A+) | SE (C+, A+)     | n.d. | "Alveoli" (A+)<br>Mac (A+) | ACE2 is present on epithelia in several parts of the respiratory tract and macrophages |
| Lung [undefined] (19)                                              | Polyclonal | n.d.                                         | n.d.        | SE (C+, N+, M+) | n.d. | AT1-<br>AT2 (N+)           | ACE2 is present in bronchial epithelium, AT2 cells and macrophages                     |
| Sinus [undefined] and Lung [undefined, same tissues as above] (20) | Polyclonal | SE (N++)                                     | SE (-)      | SE (C+, N++)    | n.d. | AT1-<br>AT2 (N++)          | ACE2 is present in sinus and bronchial epithelium, AT2 cells and macrophages           |

617  
 618 Non-diseased: The cause of death was not directly related to lung disease  
 619 n.d.: Not described  
 620 Tissues: Sinonasal (SN), trachea (T), bronchi (B), bronchioles (Br), and alveoli (Al)  
 621 Cellular localization: cytoplasmic (C), nuclear (N), apical membrane (A)  
 622 Cells: Surface epithelium (SE), alveolar type I cells (AT1), alveolar type II cells (AT2), alveolar  
 623 macrophages (Mac)  
 624 ACE2 protein (based on published reports/figures): negative (-), weak (+), moderate to abundant  
 625 (++)

626 **Supplemental Table 2. Donor demographics and ACE2 distribution scores for each tissue**  
 627 **region.**

| Case # | Group           | Age (yrs) | Sex | Comorbidities                            | Trachea | Bronchi | Bronchioles | Alveoli |
|--------|-----------------|-----------|-----|------------------------------------------|---------|---------|-------------|---------|
| 1      | Control         | 5         | F   | Trauma                                   | NA      | 2       | 2           | 1       |
| 2      | Control         | 57        | M   | Arrhythmia                               | 0       | 0       | 0           | 1       |
| 3      | Control         | 31        | M   | Stroke (Joubert syndrome)                | 1       | 1       | 0           | 0       |
| 4      | Control         | 53        | F   | Trauma                                   | NA      | 0       | 0           | 1       |
| 5      | Control         | 2         | M   | Brain hemorrhage                         | 0       | 0       | 0           | 1       |
| 6      | Control         | 2         | M   | Trauma                                   | 0       | 0       | 1           | 2       |
| 7      | Control         | 0.5       | M   | Spinomuscular atrophy                    | NA      | 0       | 1           | 0       |
| 8      | Control         | 71        | M   | Stroke, Parkinson's disease, nonsmoker   | 0       | 1       | 1           | 0       |
| 9      | Control         | 4         | F   | Trauma                                   | 0       | 0       | 0           | 2       |
| 10     | Control         | 1.2       | M   | Trauma                                   | 0       | NA      | 1           | 1       |
| 11     | Control         | 53        | F   | Trauma, nonsmoker                        | 0       | 0       | 2           | 0       |
| 12     | Control         | 26        | F   | NA                                       | 0       | NA      | 0           | 0       |
| 13     | Control         | 27        | F   | NA                                       | NA      | 0       | 1           | 0       |
| 14     | Control         | 64        | M   | NA                                       | NA      | 1       | 1           | 0       |
| 15     | Chronic disease | 53        | F   | Smoker                                   | 0       | NA      | 0           | 1       |
| 16     | Chronic disease | 60        | M   | COPD, smoker                             | NA      | NA      | 0           | 1       |
| 17     | Chronic disease | 32        | M   | COPD, smoker                             | 0       | 0       | 0           | 1       |
| 18     | Chronic disease | 68        | M   | COPD                                     | NA      | 1       | 0           | 1       |
| 19     | Chronic disease | 68        | F   | COPD                                     | NA      | NA      | 1           | 1       |
| 20     | Chronic disease | 9         | M   | Asthma                                   | 0       | 0       | 0           | 1       |
| 21     | Chronic disease | 25        | F   | Cystic fibrosis                          | NA      | 0       | 0           | 0       |
| 22     | Chronic disease | 47        | F   | Cardiovascular disease                   | 1       | 2       | 2           | 1       |
| 23     | Chronic disease | 27        | M   | Cystic fibrosis                          | 0       | NA      | NA          | 1       |
| 24     | Chronic disease | 50        | F   | Cardiovascular disease, diabetes, asthma | NA      | 0       | 0           | 0       |
| 25     | Chronic disease | 37        | M   | Drug use, smoker                         | 0       | 0       | 0           | 0       |
| 26     | Chronic disease | 38        | M   | Asthma (status asthmaticus)              | 0       | 0       | 0           | 0       |
| 27     | Chronic disease | 32        | M   | Cystic fibrosis                          | NA      | NA      | 0           | 1       |
| 28     | Chronic disease | 58        | F   | Cardiovascular disease, diabetes, NASH   | 0       | 0       | 0           | 1       |
| 29     | Chronic disease | 19        | F   | Cystic fibrosis                          | NA      | 0       | 0           | 0       |

628

629 NA: Not available for analyses / COPD: Chronic obstructive pulmonary disease / NASH: Non-  
 630 alcoholic steatohepatitis.

631 Scoring: 0 = below limit of immunohistochemical detection; 1 = rare (<1%); 2 = 1-33%; 3 = 34-  
 632 66%; 4 = >66% of cells.

633

634 **Supplemental Table 3. Parameters for immunohistochemistry on fixed tissues.**

| Target                                 | Primary Antibody                                                                                                                                                               | Antigen Retrieval                                                                                                                | Secondary Reagents                                                                                                                                                                                                                                                                   |
|----------------------------------------|--------------------------------------------------------------------------------------------------------------------------------------------------------------------------------|----------------------------------------------------------------------------------------------------------------------------------|--------------------------------------------------------------------------------------------------------------------------------------------------------------------------------------------------------------------------------------------------------------------------------------|
| Allograft Inflammatory Factor 1 (AIF1) | Anti-AIF1 polyclonal (#019-19741, Wako Pure Chemical Industries, Ltd., Richmond, VA USA) in diluent 1:1000 x 1 hour                                                            | HIER, Citrate buffer pH 6.0, 110°C for 15 min; 20 min cool down (Decloaking Chamber Plus, Biocare Medical, Concord, CA USA)      | Dako EnVision+ System-HRP Labeled Polymer Anti-rabbit, 30 min (Dako North America, Inc., Carpinteria, CA USA) AEC chromogen, counterstain.                                                                                                                                           |
| Angiotensin-Converting Enzyme 2 (ACE2) | Anti-ACE2, monoclonal (MAB933, R&D Systems, Minneapolis, MN USA) in diluent at 1:100 x 1 hour.                                                                                 | HIER, Citrate Buffer, pH 6.0, 110°C for 15 minutes; 20 min cool down (Decloaking Chamber Plus, Biocare Medical, Concord, CA USA) | Dako EnVision+ System-HRP Labeled Polymer Anti-mouse, 60 min (Dako North America, Inc., Carpinteria, CA USA), DAB Chromogen, counterstain.                                                                                                                                           |
| MUC5B                                  | Rabbit anti-MUC5B polyclonal, (LSBio #LS-B8121, LifeSpan BioSciences, Inc., Seattle, WA) in Dako Antibody Diluent (Dako North America, Inc., Carpinteria, CA); 1:60,000/30 min | HIER, Citrate buffer pH 6.0, 110°C for 15min; 20 min cool down                                                                   | Step 1: Biotinylated anti-Rabbit IgG (H+L) (Vector Laboratories, Inc., Burlingame, CA) in Dako Wash Buffer (Dako North America, Inc., Carpinteria, CA); 1:500, 30 min<br>Step 2: Vectastain ABC Kit (Vector Laboratories, Inc., Burlingame, CA), 30min. DAB Chromogen, counterstain. |
| Surfactant Protein – C (SP-C)          | Anti-SP-C, polyclonal (PA5-71680, Thermo Fisher Scientific, Waltham, MA USA) in diluent 1:100 x 1 hour                                                                         | HIER, Citrate Buffer, pH 6.0, 110°C for 15 minutes; 20 min cool down (Decloaking Chamber Plus, Biocare Medical, Concord, CA USA) | Dako EnVision+ System-HRP Labeled Polymer Anti-rabbit, 60 min (Dako North America, Inc., Carpinteria, CA USA), AEC chromogen, counterstain.                                                                                                                                          |

635

636 HIER – Heat-induced epitope retrieval

637 DAB – 3,3'-Diaminobenzidine (produces brown stain)

638 AEC - aminoethyl carbazole (produces red stain)

639 Counterstain – Harris hematoxylin (blue color)
